# Supplementary material for: Ring-Opening Polymerization of 1,3-Benzoxazines via Borane Catalyst
Source: PubMed Central journal article supplement (PMC6415064; doi:10.3390/polym10030239), 2018-02-27
Supplement: polymers-10-00239-s001.pdf [file polymers-10-00239-s001.pdf]

Supplementary Materials

**Ring-opening polymerization of 1,3-benzoxazines  
via borane catalyst**

Mustafa Arslan<sup>1</sup>, Baris Kiskan<sup>\*1</sup>, Yusuf Yagci<sup>\*1</sup>

<sup>1</sup> *Istanbul Technical University, Department of Chemistry, 34469, Maslak, Istanbul, Turkey*

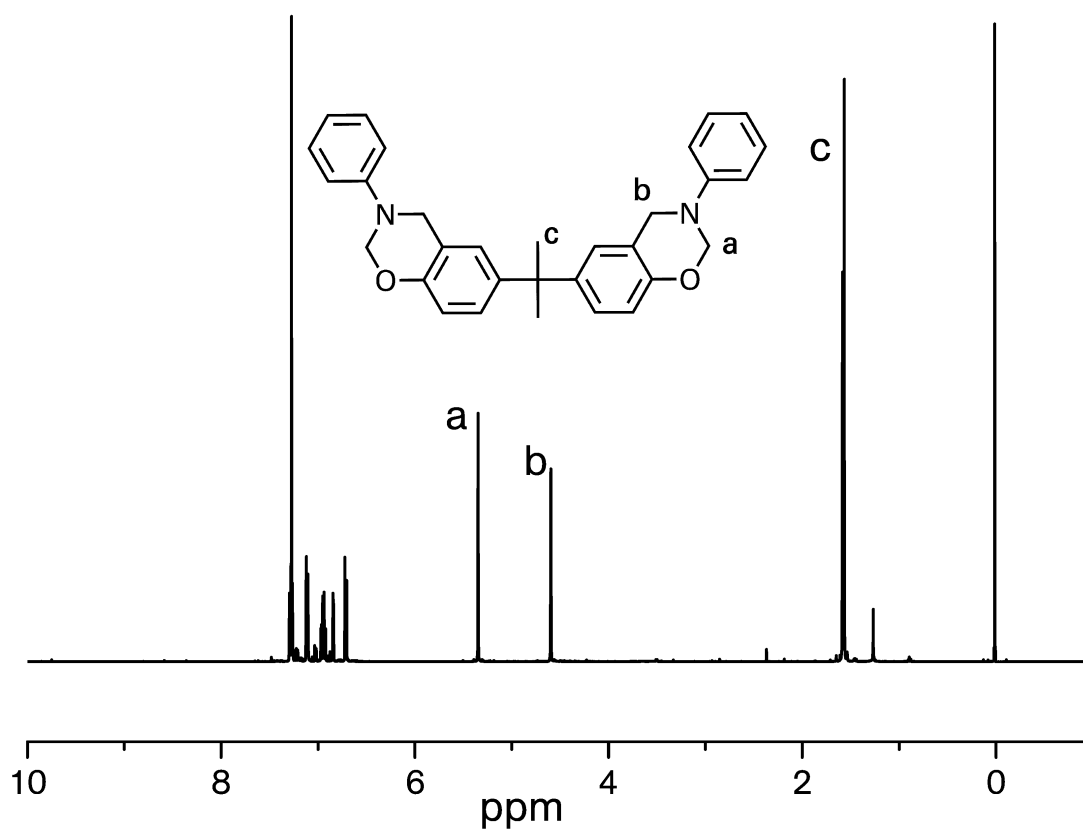

**Figure S1:** <sup>1</sup>H NMR spectrum of B-a monomer

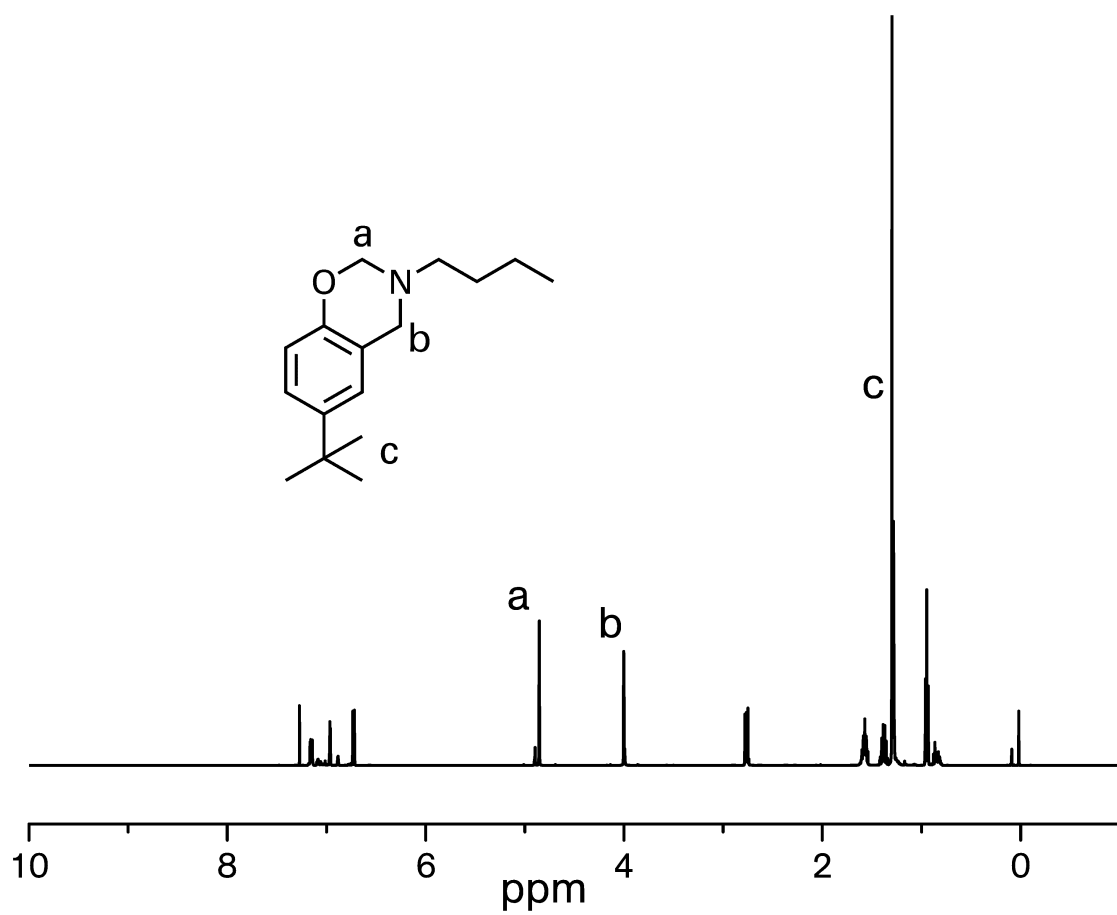

**Figure S2:** <sup>1</sup>H NMR spectrum of *t*-P-Bt monomer

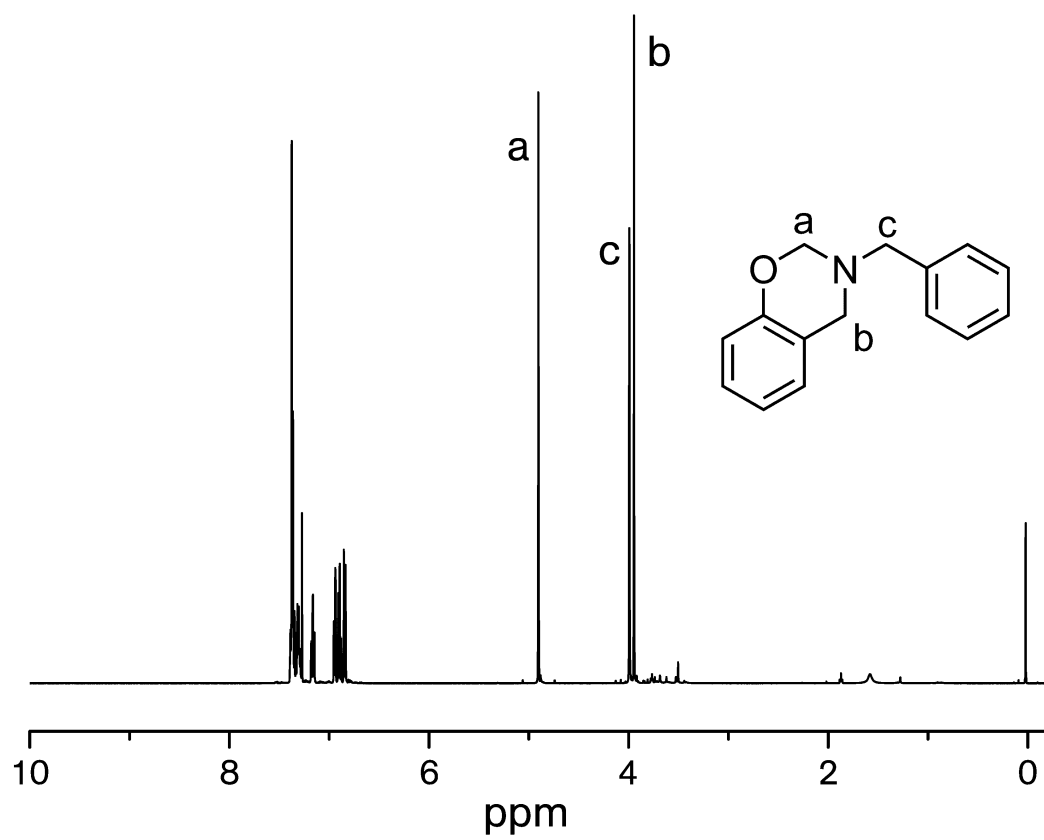

**Figure S3:**  $^1\text{H}$  NMR spectrum of P-Bn monomer

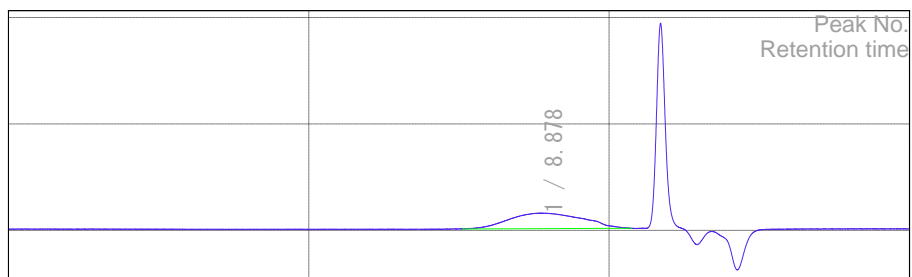

**Figure S4:** Gel permeation chromatogram of cured *t*-P-Bt

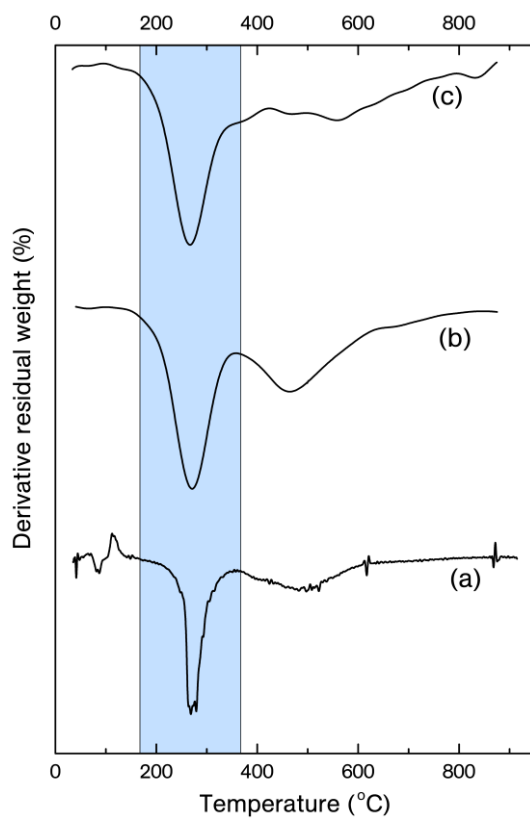

**Figure S5:** Derivative TGA of cured *t*-P-Bt (b), *t*-P-Bt / 3% B(C<sub>6</sub>F<sub>5</sub>)<sub>3</sub> (a), *t*-P-Bt / 5% B(C<sub>6</sub>F<sub>5</sub>)<sub>3</sub> (c)

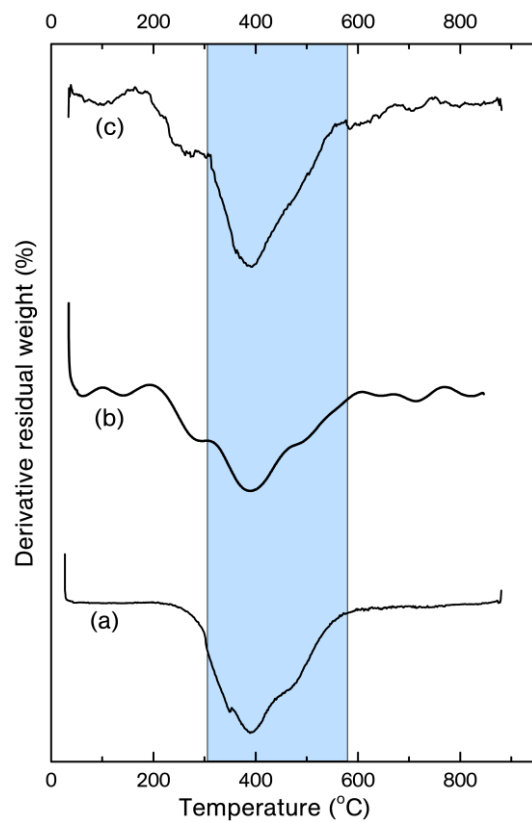

**Figure S6:** Derivative TGA of cured B-a (a), B-a /3% B(C<sub>6</sub>F<sub>5</sub>)<sub>3</sub> (b), B-a /5% B(C<sub>6</sub>F<sub>5</sub>)<sub>3</sub> (c)
